# Supplementary material for: A novel approach to iron oxide separation from e-waste and bisphenol A detection in thermal paper receipts using recovered nanocomposites
Source: Royal Society of Chemistry journal article supplement (doi:10.1039/c8ra08017h), 2018-01-01
Supplement: c8ra08017h1.pdf [file c8ra08017h1.pdf]

**SUPPLEMENTARY DATA:**

S1. Chemical purchases and instrumentations:

All the chemicals and reagents were purchased from Sigma-Aldrich (<http://www.sigmaaldrich.com/taiwan.html>), but BPA was from India. All the chemicals were utilized without any purifications. The screen-printed carbon electrodes were bought from Zensor R&D Co., Ltd., Taipei, Taiwan ([http://www.zensor.com.tw/index\\_en.html](http://www.zensor.com.tw/index_en.html)). The supporting electrolyte consumed for the electrochemical studies is 0.1 M phosphate buffer pH 7. The resulting plots exhibited were the average of no less than three experiments. The error bars were provided from the standard deviation of those three measurements.

The electrochemical experiments were carried out through CHI 1205B workstation. The experiments were done in a conventional three-electrode cell using BAS SPCE as a working electrode (area 0.20 cm<sup>2</sup>), Pt wire as a counter electrode, and saturated Ag/AgCl as a reference electrode. *it*-curves were obtained through the analytical rotator AFMSRX (PINE instruments, USA) by a rotating disc electrode (RDE) with the working area of 0.24 cm<sup>2</sup>. The X-ray photoelectron spectroscopy studies were done through a PerkinElmer PHI-5702. Field Emission Scanning electron microscopy (FE-SEM) studies were made with Hitachi S-3000 H scanning electron microscope. A Hewlett-Packard (Palo Alto, USA) 1050 HPLC system was used for HPLC analysis and wavelength of the UV detector was set at 275 nm.

S2. Existence of other materials in recovered  $\text{Fe}_3\text{O}_4$ :

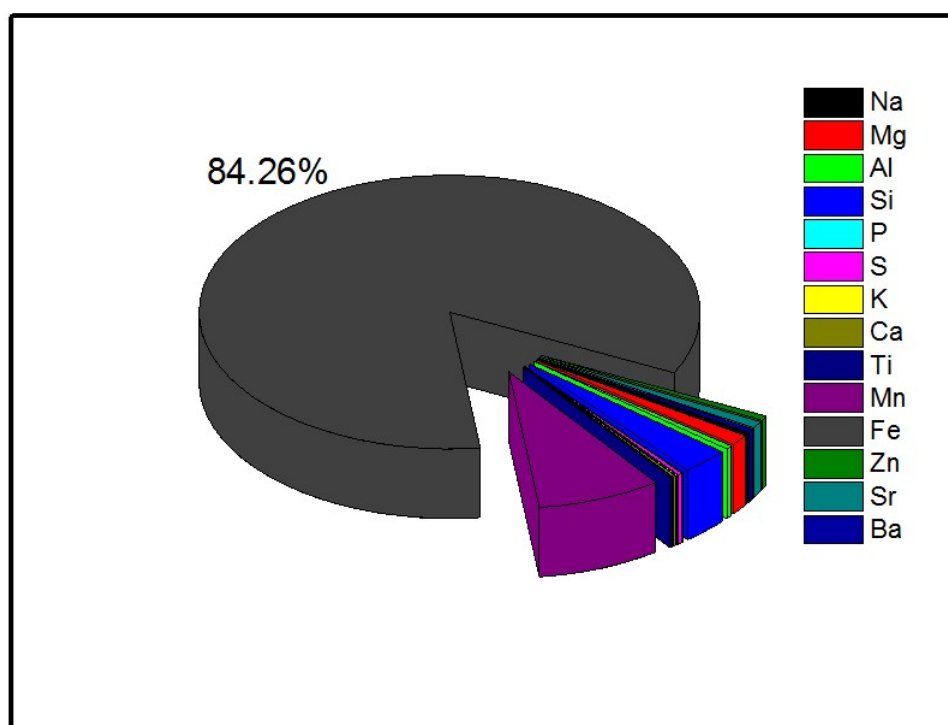

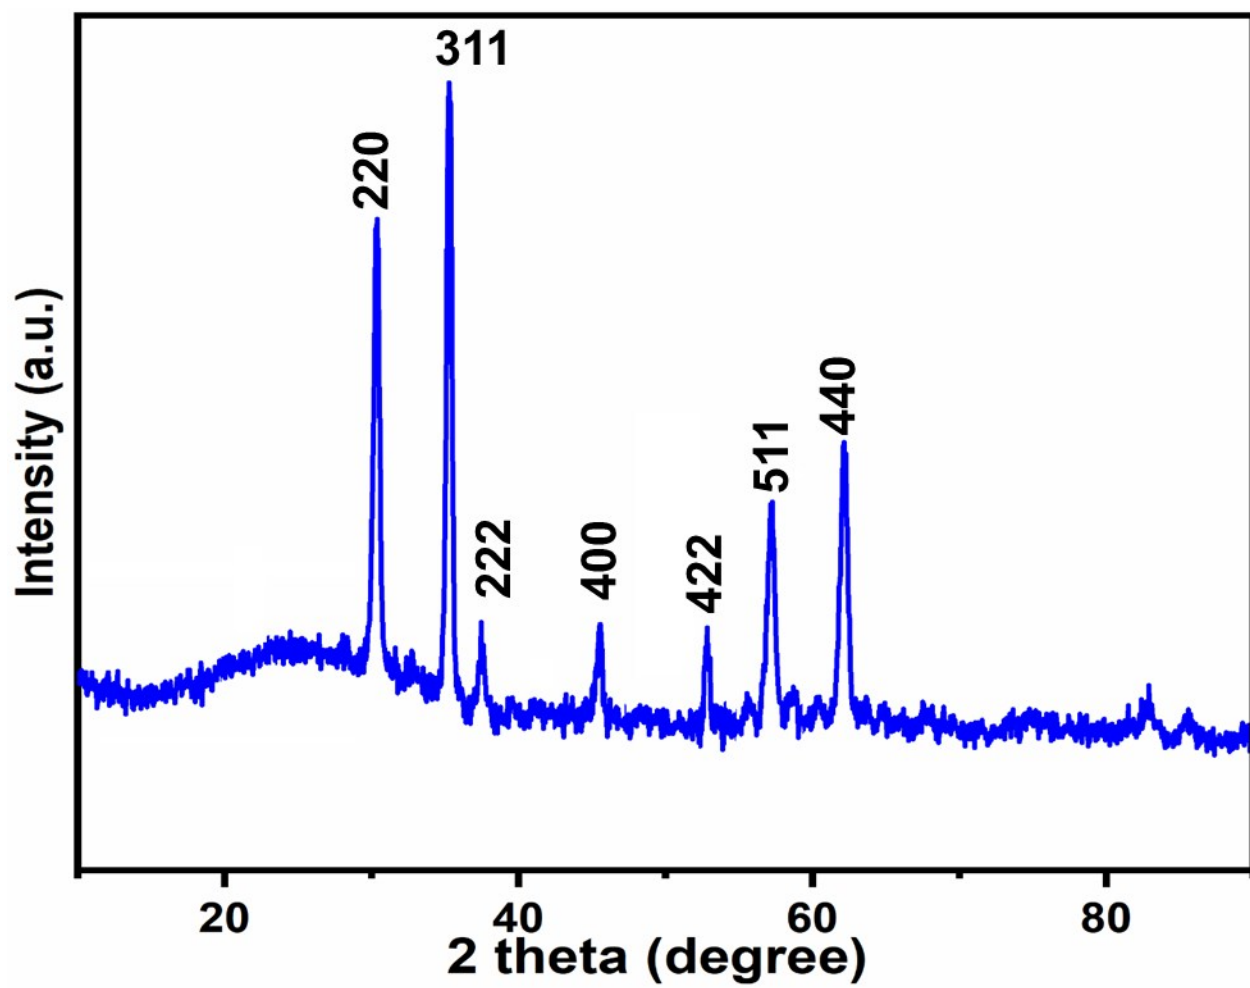

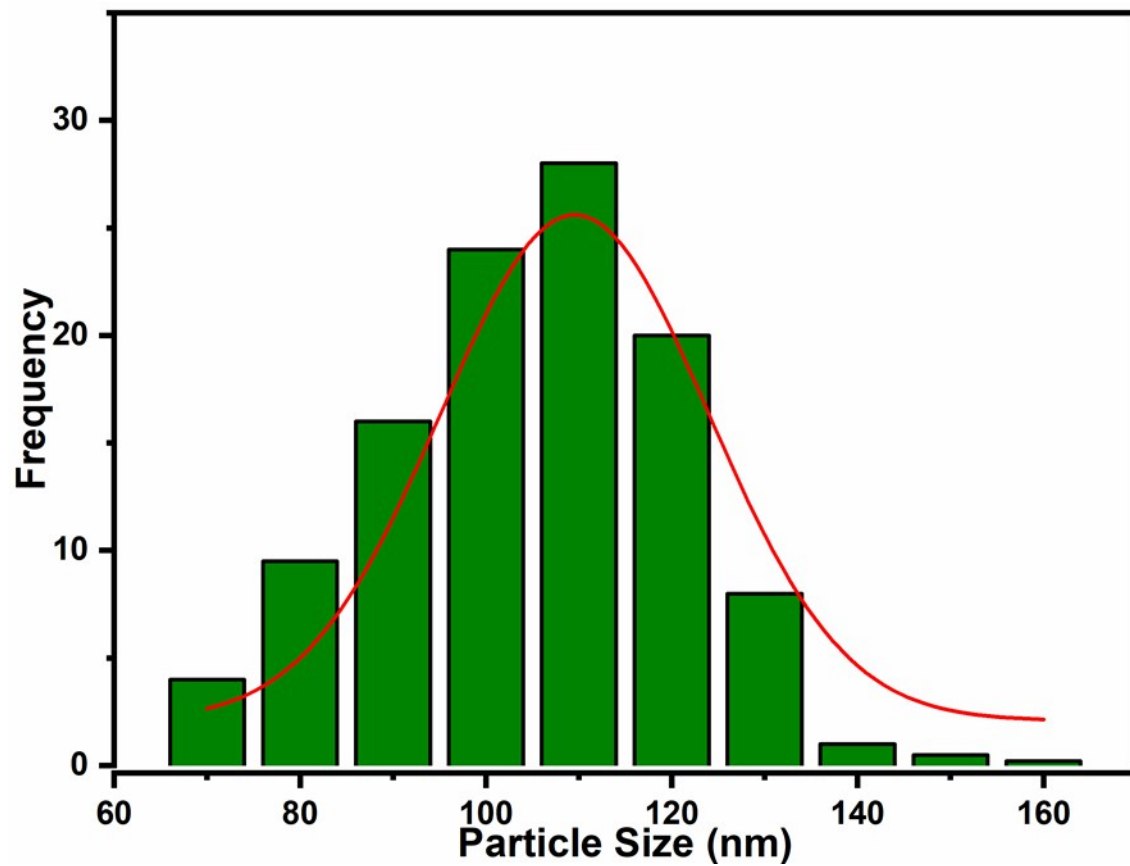

S3. Repeatability:

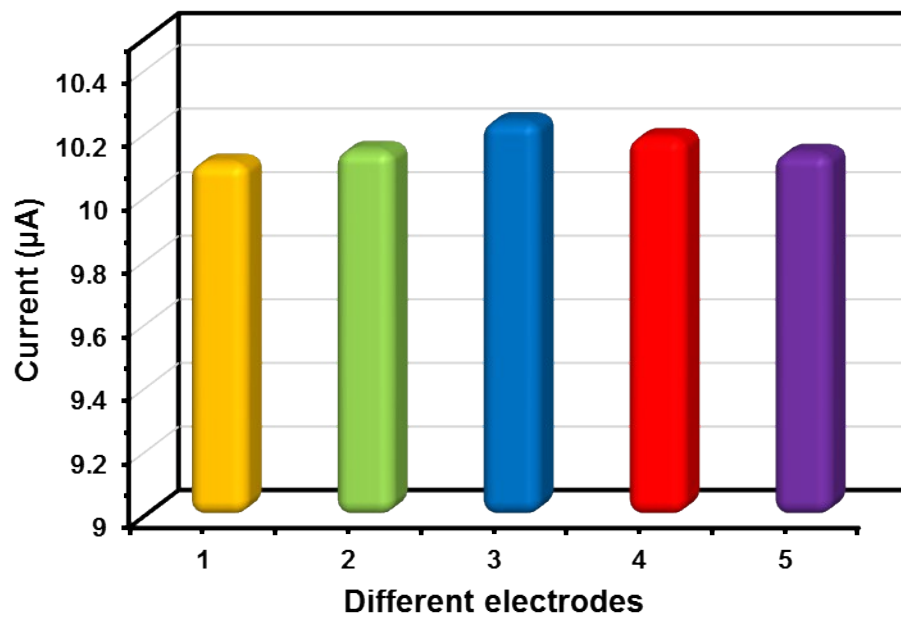

CVs obtained at five individual  $\text{Fe}_3\text{O}_4/\text{GO}/\text{GCEs}$  in pH 7 (0.1 M) comprising  $50\mu\text{M}$  BPA, which is explained in sec 3.10
